# Supplementary material
Source: Elsevier journal article supplement (https://www.sciencedirect.com/science/article/pii/S2255553618301174)
Supplement: mmc1 [file S2255553618301174:mmc1.docx]

JPED_2018-401_Material Complementar

Arquivo Complementar 1: Estratégia de busca.

| **Base de dados** | **Termos usados** |
| --- | --- |
| Medline | “Comportamento sedentário” OU sentado OU “tempo sentado” OU deitado OU sentado OU “assistir à TV” OU “assistindo à TV” OU “uso de computador” OU sedentário OU “restrição de atividade” OU “estilo de vida sedentário” OU inatividade OU “videogames” OU televisão OU “tempo de tela” OU “visualização de tela” OU “assistir à TV” E Prevalência [Mesh] OU Prevalência E Adolescentes OU *teen* OU *teenager* OU jovem OU jovens OU adolescência OU meninas OU meninas E Brasil [Mesh] OU Brasila OU Brasil OU “Minas Gerais” OU “São Paulo” OU “Espirito Santo” OU “Rio de Janeiro” OU Bahia OU Pará OU “Mato Grosso” OU “Mato Grosso do Sul” OU Goiás OU “Rio Grande do Sul” OU Ceará OU Pernambuco OU “Santa Catarina”] OU Amazonas OU Maranhão OU Tocantins OU Piauí OU Rondônia OU Roraima OU Paraná OU Acre OU Amapá OU Paraíba OU “Rio Grande do Norte” OU Alagoas OU Sergipe OU “Distrito Federal” |
| Scielo | Inglês  (“sedentary behavior”) E (adolescents) E (prevalence)  Português  (“comportamento sedentário”) E (adolescentes) E (prevalência) |
| Lilacs | Inglês  (tw:(“sedentary behavior” )) E (tw:(adolescents)) E (tw:(prevalence))  Português  Comportamento sedentário E adolescente E prevalência |
| Adolec | Inglês  (tw:(“sedentary behavior” )) E (tw:(adolescents)) E (tw:(prevalence))  Português  Comportamento sedentário E adolescente E prevalência |
