# Supplementary material
Source: Elsevier journal article supplement (https://www.sciencedirect.com/science/article/pii/S2255553618301174)
Supplement: mmc2 [file S2255553618301174:mmc2.xlsx]

## Sheet: Sheet1
Arquivo Complementar 2: Risco de viés, resumo dos estudos incluídos.
	Validade Externa					Validade interna
Estudo, ano	População-alvo, representação próxima da população nacional	Representação fiel da população-alvo na estrutura da amostra	Seleção aleatória utilizada	Risco mínimo de viés de não resposta	Dados coletados de indivíduos (não informante secundário)	Definição de caso aceitável	Medição confiável e da validade do parâmetro de interesse	Modo sistemático de coleta de dados	Período de prevalência adequado	Numeradores e denominadores adequados	Risco geral
Rivera et al., 2010	Baixo Risco	Baixo Risco	Baixo Risco	Baixo Risco	Baixo Risco	Baixo Risco	Baixo Risco	Baixo Risco	Baixo Risco	Baixo Risco	Baixo Risco
Tenório et al., 2010	Baixo Risco	Baixo Risco	Baixo Risco	Baixo Risco	Baixo Risco	Baixo Risco	Baixo Risco	Baixo Risco	Baixo Risco	Baixo Risco	Baixo Risco
Silva et al 2014	Baixo Risco	Baixo Risco	Baixo Risco	Alto Risco	Baixo Risco	Baixo Risco	Alto Risco	Baixo Risco	Baixo Risco	Baixo Risco	Risco Moderado
de Lucena et al., 2015	Baixo Risco	Baixo Risco	Baixo Risco	Baixo Risco	Baixo Risco	Baixo Risco	Baixo Risco	Baixo Risco	Baixo Risco	Baixo Risco	Baixo Risco
Silva et al., 2016	Baixo Risco	Baixo Risco	Baixo Risco	Baixo Risco	Baixo Risco	Baixo Risco	Baixo Risco	Baixo Risco	Baixo Risco	Baixo Risco	Baixo Risco
Wendpap et al., 2014	Alto Risco	Alto Risco	Alto Risco	Baixo Risco	Baixo Risco	Baixo Risco	Baixo Risco	Baixo Risco	Baixo Risco	Baixo Risco	Alto Risco
Ceschini et al., 2009	Baixo Risco	Baixo Risco	Baixo Risco	Alto Risco	Baixo Risco	Baixo Risco	Baixo Risco	Baixo Risco	Baixo Risco	Baixo Risco	Risco Moderado
de Vitta et al., 2011	Baixo Risco	Baixo Risco	Alto Risco	Baixo Risco	Baixo Risco	Baixo Risco	Alto Risco	Baixo Risco	Baixo Risco	Baixo Risco	Risco Moderado
de Vitta et al., 2014	Baixo Risco	Baixo Risco	Baixo Risco	Baixo Risco	Baixo Risco	Baixo Risco	Alto Risco	Baixo Risco	Baixo Risco	Baixo Risco	Baixo Risco
de Prado Junior et al 2015	Baixo Risco	Alto Risco	Alto Risco	Alto Risco	Baixo Risco	Baixo Risco	Alto Risco	Baixo Risco	Baixo Risco	Baixo Risco	Alto Risco
Fernandes et al., 2015	Baixo Risco	Baixo Risco	Alto Risco	Baixo Risco	Baixo Risco	Baixo Risco	Alto Risco	Baixo Risco	Baixo Risco	Baixo Risco	Risco Moderado
Dutra et al., 2006	Baixo Risco	Baixo Risco	Baixo Risco	Baixo Risco	Baixo Risco	Baixo Risco	Alto Risco	Baixo Risco	Baixo Risco	Baixo Risco	Baixo Risco
Silva et al., 2008	Baixo Risco	Baixo Risco	Baixo Risco	Baixo Risco	Baixo Risco	Baixo Risco	Baixo Risco	Baixo Risco	Baixo Risco	Baixo Risco	Baixo Risco
Campagnolo et al., 2007	Baixo Risco	Baixo Risco	Baixo Risco	Alto Risco	Baixo Risco	Baixo Risco	Baixo Risco	Baixo Risco	Baixo Risco	Baixo Risco	Risco Moderado
Dumith et al., 2010	Baixo Risco	Baixo Risco	Baixo Risco	Baixo Risco	Baixo Risco	Baixo Risco	Baixo Risco	Baixo Risco	Baixo Risco	Baixo Risco	Baixo Risco
Silva et al., 2011	Baixo Risco	Baixo Risco	Baixo Risco	Baixo Risco	Baixo Risco	Baixo Risco	Alto Risco	Baixo Risco	Baixo Risco	Baixo Risco	Baixo Risco
Filho et al., 2012	Baixo Risco	Baixo Risco	Baixo Risco	Baixo Risco	Baixo Risco	Baixo Risco	Baixo Risco	Baixo Risco	Baixo Risco	Baixo Risco	Baixo Risco
Rech et al., 2013	Baixo Risco	Baixo Risco	Baixo Risco	Baixo Risco	Baixo Risco	Baixo Risco	Alto Risco	Baixo Risco	Baixo Risco	Baixo Risco	Baixo Risco
Silva et al., 2014a	Baixo Risco	Baixo Risco	Baixo Risco	Baixo Risco	Baixo Risco	Baixo Risco	Baixo Risco	Baixo Risco	Baixo Risco	Baixo Risco	Baixo Risco
Coledam et al., 2014	Baixo Risco	Baixo Risco	Baixo Risco	Baixo Risco	Baixo Risco	Baixo Risco	Baixo Risco	Baixo Risco	Baixo Risco	Baixo Risco	Baixo Risco
Cristofaro et al., 2015	Baixo Risco	Alto Risco	Alto Risco	Alto Risco	Baixo Risco	Baixo Risco	Baixo Risco	Baixo Risco	Baixo Risco	Baixo Risco	Alto Risco
Castro et al., 2016	Baixo Risco	Baixo Risco	Baixo Risco	Baixo Risco	Baixo Risco	Baixo Risco	Alto Risco	Baixo Risco	Baixo Risco	Baixo Risco	Baixo Risco
Golcalves et al., 2016	Baixo Risco	Baixo Risco	Baixo Risco	Baixo Risco	Baixo Risco	Baixo Risco	Baixo Risco	Baixo Risco	Baixo Risco	Baixo Risco	Baixo Risco
Bacil et al., 2016	Baixo Risco	Baixo Risco	Baixo Risco	Alto Risco	Baixo Risco	Baixo Risco	Baixo Risco	Baixo Risco	Baixo Risco	Baixo Risco	Risco Moderado
Ferreira et al., 2016	Baixo Risco	Baixo Risco	Baixo Risco	Alto Risco	Baixo Risco	Baixo Risco	Baixo Risco	Baixo Risco	Baixo Risco	Baixo Risco	Risco Moderado
Camelo et al., 2012	Baixo Risco	Baixo Risco	Baixo Risco	Baixo Risco	Baixo Risco	Baixo Risco	Alto Risco	Baixo Risco	Baixo Risco	Baixo Risco	Baixo Risco
Rezende et al., 2014	Baixo Risco	Baixo Risco	Baixo Risco	Baixo Risco	Baixo Risco	Baixo Risco	Alto Risco	Baixo Risco	Baixo Risco	Baixo Risco	Baixo Risco
Oliveira et al., 2016	Baixo Risco	Baixo Risco	Baixo Risco	Alto Risco	Baixo Risco	Baixo Risco	Alto Risco	Baixo Risco	Baixo Risco	Baixo Risco	Risco Moderado
a Dados de assistir à TV e tempo total de tela em 2001 e 2011.
